# Supplementary material for: Effects of Fishing Selectivity and Dynamics on the Performance of Catch-Based Data-Limited Assessment Models for Species with Different Life History Traits
Source: MDPI journal article supplement (doi:10.3390/fishes8030130), 2023-02-24
Supplement: s1 [file s1]

**Table S1.** The life-history parameters used for simulating the population dynamics of the 27 species in the four life history strategy groups. The fecundity were determined with the following options: 2: fecundity =  $a \cdot L^b$ , 4: fecundity =  $a + b \cdot L$ , 5: fecundity =  $a + b \cdot wt$ .  $L$  is length in cm and  $wt$  is weight in kg.

| strategist group                                     | opportunistic strategists        |                               |                                |                                |                                 |
|------------------------------------------------------|----------------------------------|-------------------------------|--------------------------------|--------------------------------|---------------------------------|
| Number                                               | 1                                | 2                             | 3                              | 4                              | 5                               |
| scientific name                                      | <i>Stenobranchus leucopsarus</i> | <i>Thaleichthys pacificus</i> | <i>Ammodytes hexapterus</i>    | <i>Sardinops sagax</i>         | <i>Clupea harengus pallasii</i> |
| common name                                          | Northern lampfish                | Eulachon                      | Pacific sandlance              | sardine                        | Herring                         |
| Parameter                                            |                                  |                               |                                |                                |                                 |
| Natural mortality (year <sup>-1</sup> )              | 0.7 (0.6~0.8) <sup>1</sup>       | 0.8 (0.7~0.9) <sup>5</sup>    | 0.5 (0.4~0.6) <sup>9</sup>     | 0.7 (0.6~0.8) <sup>12</sup>    | 0.7 (0.6~0.8) <sup>15</sup>     |
| Length at min age (cm)                               | 2 (0.01~7) <sup>1</sup>          | 3 (0.01~8) <sup>5</sup>       | 4 (0.01~9) <sup>9</sup>        | 5 (0.01~10) <sup>12</sup>      | 4.2 (0.01~9.2) <sup>15</sup>    |
| Length at max age (cm)                               | 11 (6~16) <sup>1</sup>           | 19 (14~24) <sup>5</sup>       | 24 (19~29) <sup>9</sup>        | 34 (29~39) <sup>12</sup>       | 27 (22~32) <sup>15</sup>        |
| growth rate (year <sup>-1</sup> )                    | 0.3 (0.2~0.4) <sup>1</sup>       | 0.3 (0.2~0.4) <sup>5</sup>    | 0.2 (0.1~0.3) <sup>9</sup>     | 0.3 (0.2~0.4) <sup>12</sup>    | 0.5 (0.4~0.6) <sup>15</sup>     |
| Coefficient of variation of length at young fish (-) | 0.1 (0.01~0.5)                   |                               |                                |                                |                                 |
| Coefficient of variation of length at old fish (-)   | 0.1 (0.01~0.5)                   |                               |                                |                                |                                 |
| Length-weight scaling (kg cm <sup>-β</sup> )         | 4.5e-03 (0~3) <sup>1</sup>       | 3.9e-06 (0~3) <sup>5</sup>    | 2.6e-5 (0~3) <sup>9</sup>      | 9e-06 (0~3) <sup>12</sup>      | 4.3e-05 (0~3) <sup>15</sup>     |
| Allometric factor (-)                                | 3.3 (2.5~3.5) <sup>1</sup>       | 3.2 (2.5~3.5) <sup>5</sup>    | 3.2 (2.5~3.6) <sup>9</sup>     | 3.1 (2.5~3.5) <sup>12</sup>    | 3.2 (2.5~3.5) <sup>15</sup>     |
| Length at 50% maturity (cm)                          | 3 (0.01~8) <sup>2</sup>          | 7.9 (2.9~12.9) <sup>6</sup>   | 7.7 (2.7~12.7) <sup>9</sup>    | 16 (11~21) <sup>12</sup>       | 18.3 (13.3~23.3) <sup>16</sup>  |
| Maturity slope (cm <sup>-1</sup> )                   | -0.2 (-0.3~-0.1) <sup>2</sup>    | -0.5 (-0.6~-0.4) <sup>6</sup> | -0.4 (-0.5~-0.3) <sup>9</sup>  | -0.9 (-1.0~-0.8) <sup>12</sup> | -0.2 (-0.3~-0.1) <sup>16</sup>  |
| fecundity option                                     | 5                                | 4                             | 5                              | 5                              | 5                               |
| Fecundity intercept (eggs/kg)                        | 0.01 (-0.1~0.1) <sup>3</sup>     | -49 (-54~-44) <sup>7</sup>    | -0.7 (-0.8~-0.6) <sup>10</sup> | -12 (-17~-7) <sup>13</sup>     | -38 (-43~-33) <sup>17</sup>     |

|                                         |                                                                                                |                                                                                    |                                                                     |                                                                                     |                                                                                                      |
|-----------------------------------------|------------------------------------------------------------------------------------------------|------------------------------------------------------------------------------------|---------------------------------------------------------------------|-------------------------------------------------------------------------------------|------------------------------------------------------------------------------------------------------|
| Fecundity slope (eggs/kg <sup>2</sup> ) | 1 (-4~6) <sup>3</sup>                                                                          | 516 (511~521) <sup>7</sup>                                                         | 710 (705~715) <sup>10</sup>                                         | 453 (448~458) <sup>13</sup>                                                         | 560 (555~565) <sup>17</sup>                                                                          |
| Log mean virgin recruitment (-)         | 10 (8~12) <sup>4</sup>                                                                         | 11 (9~13) <sup>8</sup>                                                             | 11.4 (9.4~13.4) <sup>11</sup>                                       | 9 (7~11) <sup>14</sup>                                                              | 10.2 (8.2~12.2) <sup>18</sup>                                                                        |
| Steepness (-)                           | 0.5 (0.4~0.6) <sup>4</sup>                                                                     | 0.8 (0.7~0.9) <sup>8</sup>                                                         | 0.8 (0.7~0.9) <sup>11</sup>                                         | 0.6 (0.5~0.7) <sup>14</sup>                                                         | 0.9 (0.8~1.0) <sup>18</sup>                                                                          |
| reference                               | 1. Fishbase<br>2. Sassa et al., 2014<br>3. Eva Garcia Seoane,<br>2013<br>4. Brand et al., 2007 | 5. Fishbase<br>6. Y.Liang et al.,<br>2014<br>7. Hay, 2000<br>8. Brand et al., 2007 | 9. Fishbase<br>10. Nelson & Ross,<br>1991<br>11. Brand et al., 2007 | 12. Fishbase<br>13. Griffith et al.,<br>2005<br>14. Galindo-<br>Cortes et al., 2010 | 15. Fishbase<br>16. Haist & Stocker,<br>1985<br>17. Burd & Howlett,<br>1974<br>18. Nash et al., 2009 |

| strategist group                                     | equilibrium strategists      |                              |                                |                                |                                |                             |                              |
|------------------------------------------------------|------------------------------|------------------------------|--------------------------------|--------------------------------|--------------------------------|-----------------------------|------------------------------|
| Number                                               | 6                            | 7                            | 8                              | 9                              | 10                             | 11                          | 12                           |
| scientific name                                      | <i>Raja rhina</i>            | <i>Raja binoculata</i>       | <i>Alopias pelagicus</i>       | <i>Carcharhinus longimanus</i> | <i>Squalus acanthias</i>       | <i>Hydrolagus colliei</i>   | <i>Hexanchus griseus</i>     |
| common name                                          | Longnose skate               | Big skate                    | pelagic thresher               | Oceanic whitetip shark         | dogfish                        | spotted ratfish             | Sixgill shark                |
| Parameter                                            |                              |                              |                                |                                |                                |                             |                              |
| Natural mortality (year <sup>-1</sup> )              | 0.1 (0.01~0.2) <sup>19</sup> | 0.1 (0.01~0.2) <sup>22</sup> | 0.12 (0.02~0.22) <sup>27</sup> | 0.15 (0.05~0.25) <sup>31</sup> | 0.21 (0.11~0.31) <sup>35</sup> | 0.3 (0.2~0.4) <sup>39</sup> | 0.1 (0.01~0.2) <sup>43</sup> |
| Length at min age (cm)                               | 15 (10~20) <sup>19</sup>     | 23 (18~28) <sup>22</sup>     | 28 (23~33) <sup>27</sup>       | 30 (25~35) <sup>31</sup>       | 10.3 (5.3~15.3) <sup>35</sup>  | 11 (6~16) <sup>39</sup>     | 37 (32~42) <sup>43</sup>     |
| Length at max age (cm)                               | 132 (127~137) <sup>19</sup>  | 247 (242~252) <sup>22</sup>  | 328 (323~333) <sup>27</sup>    | 402 (397~407) <sup>31</sup>    | 85.4 (80.4~90.4) <sup>35</sup> | 96 (91~101) <sup>39</sup>   | 484 (479~489) <sup>43</sup>  |
| growth rate (year <sup>-1</sup> )                    | 0.1 (0.01~0.2) <sup>19</sup> | 0.1 (0.01~0.2) <sup>22</sup> | 0.12 (0.02~0.22) <sup>27</sup> | 0.1 (0.01~0.2) <sup>31</sup>   | 0.14 (0.04~0.24) <sup>35</sup> | 0.2 (0.1~0.3) <sup>39</sup> | 0.2 (0.1~0.3) <sup>43</sup>  |
| Coefficient of variation of length at young fish (-) | 0.1 (-0.01~0.5)              |                              |                                |                                |                                |                             |                              |
| Coefficient of variation                             | 0.1 (0.01~0.5)               |                              |                                |                                |                                |                             |                              |

|                                                 |                                        |                                        |                                      |                                      |                                      |                                      |                                      |
|-------------------------------------------------|----------------------------------------|----------------------------------------|--------------------------------------|--------------------------------------|--------------------------------------|--------------------------------------|--------------------------------------|
| of length at old fish (-)                       |                                        |                                        |                                      |                                      |                                      |                                      |                                      |
| Length-weight scaling<br>(kg cm <sup>-3</sup> ) | 2.2e-5 (0~3) <sup>19</sup>             | 3.1e-5 (0~3) <sup>22</sup>             | 1.6e-5 (0~3) <sup>27</sup>           | 1.7e-04 (0~3) <sup>31</sup>          | 1e-06 (0~3) <sup>35</sup>            | 3e-7 (0~3) <sup>39</sup>             | 3.4e-05 (0~3) <sup>43</sup>          |
| Allometric factor (-)                           | 3.3 (2.5~3.5) <sup>19</sup>            | 3.2 (2.5~3.5) <sup>22</sup>            | 3 (2.5~3.5) <sup>27</sup>            | 3 (2.5~3.5) <sup>31</sup>            | 3.2 (2.5~3.5) <sup>35</sup>          | 3 (2.5~3.5) <sup>39</sup>            | 3.1 (2.5~3.5) <sup>43</sup>          |
| Length at 50%<br>maturity (cm)                  | 113 (108~118) <sup>20</sup>            | 149 (144~154) <sup>23</sup>            | 285 (280~290) <sup>28</sup>          | 225 (220~230) <sup>32</sup>          | 72.8<br>(67.8~77.8) <sup>36</sup>    | 39 (34~44) <sup>40</sup>             | 215 (210~220) <sup>44</sup>          |
| Maturity slope (cm <sup>-1</sup> )              | -0.03 (-0.13~0.07) <sup>20</sup>       | -0.01 (-0.11~0.09) <sup>23</sup>       | -0.04 (-<br>0.14~0.06) <sup>28</sup> | -0.02 (-<br>0.12~0.08) <sup>32</sup> | -0.06 (-<br>0.16~0.04) <sup>36</sup> | -0.09 (-<br>0.19~0.01) <sup>40</sup> | -0.01 (-<br>0.11~0.99) <sup>44</sup> |
| fecundity option                                | 4                                      | 4                                      | 4                                    | 4                                    | 4                                    | 4                                    | 4                                    |
| Fecundity intercept<br>(eggs/kg)                | -0.03 (-0.04~-<br>0.02) <sup>20</sup>  | -0.03 (-0.04~-<br>0.02) <sup>24</sup>  | -0.1 (-0.2~0) <sup>29</sup>          | -0.1 (-0.2~0) <sup>33</sup>          | -2 (-7~3) <sup>37</sup>              | -2 (-7~3) <sup>41</sup>              | -0.1 (-0.2~0) <sup>45</sup>          |
| Fecundity slope<br>(eggs/kg <sup>2</sup> )      | 0.001<br>(0.0005~0.0015) <sup>20</sup> | 0.001<br>(0.0005~0.0015) <sup>24</sup> | 0.0005 (-0.1~0.1) <sup>29</sup>      | 0.0005 (-<br>0.1~0.1) <sup>33</sup>  | 0.1 (0.01~0.2) <sup>37</sup>         | 0.1 (0.01~0.2) <sup>41</sup>         | 0.0005 (-<br>0.1~0.1) <sup>45</sup>  |
| Log mean virgin<br>recruitment (-)              | 7 (5~9) <sup>21</sup>                  | 7 (5~9) <sup>25</sup>                  | 5.7 (3.7~7.7) <sup>30</sup>          | 5.7 (3.7~7.7) <sup>34</sup>          | 5.6 (3.6~7.6) <sup>38</sup>          | 7.6 (5.6~9.6) <sup>42</sup>          | 3.9 (1.9~5.9) <sup>46</sup>          |
| Steepness (-)                                   | 0.5 (0.4~0.6) <sup>21</sup>            | 0.5 (0.4~0.6) <sup>25</sup>            | 0.5 (0.3~0.6) <sup>30</sup>          | 0.5 (0.3~0.6) <sup>34</sup>          | 0.83<br>(0.73~0.93) <sup>38</sup>    | 0.5 (0.3~0.6) <sup>42</sup>          | 0.5 (0.4~0.6) <sup>46</sup>          |

|           |                                                               |                                                                                            |                                                                                                  |                                                                                                  |                                                                                                        |                                                                                                        |                                                                                                   |
|-----------|---------------------------------------------------------------|--------------------------------------------------------------------------------------------|--------------------------------------------------------------------------------------------------|--------------------------------------------------------------------------------------------------|--------------------------------------------------------------------------------------------------------|--------------------------------------------------------------------------------------------------------|---------------------------------------------------------------------------------------------------|
| reference | 19. Fishbase<br>20. Holden, 1975<br>21. Brand et al.,<br>2007 | 22. Fishbase<br>23. Ebert et al.,<br>2008<br>24. Holden, 1975<br>25. Brand et al.,<br>2007 | 27. Fishbase<br>28. Drew et al.,<br>2015<br>29. Hsu et al.,<br>2011<br>30. Brand et al.,<br>2007 | 31. Fishbase<br>32. Drew et al.,<br>2015<br>33. Hsu et al.,<br>2011<br>34. Brand et<br>al., 2007 | 35. Fishbase<br>36. King<br>& McPhie, 2015<br>37. Dutton<br>& Gioia, 2019<br>38. Brand et<br>al., 2007 | 39. Fishbase<br>40. King<br>& McPhie, 2015<br>41. Dutton<br>& Gioia, 2019<br>42. Brand et<br>al., 2007 | 43. Fishbase<br>44. Ebert et al.,<br>2008<br>45. Hsu et al.,<br>2011<br>46. Brand et al.,<br>2007 |
|-----------|---------------------------------------------------------------|--------------------------------------------------------------------------------------------|--------------------------------------------------------------------------------------------------|--------------------------------------------------------------------------------------------------|--------------------------------------------------------------------------------------------------------|--------------------------------------------------------------------------------------------------------|---------------------------------------------------------------------------------------------------|

Table S1. Cont.

| strategist group                                     | salmonic strategists           |                                |                                |                                |                                 |
|------------------------------------------------------|--------------------------------|--------------------------------|--------------------------------|--------------------------------|---------------------------------|
| Number                                               | 13                             | 14                             | 15                             | 16                             | 17                              |
| scientific name                                      | <i>Oncorhynchus gorbuscha</i>  | <i>Oncorhynchus keta</i>       | <i>Oncorhynchus kisutch</i>    | <i>Oncorhynchus nerka</i>      | <i>Oncorhynchus tshawytscha</i> |
| common name                                          | Chum salmon                    | Pink salmon                    | Coho salmon                    | Sockeye salmon                 | Chinook salmon                  |
| Parameter                                            |                                |                                |                                |                                |                                 |
| Natural mortality (year <sup>-1</sup> )              | 0.5 (0.4~0.6) <sup>47</sup>    | 0.4 (0.3~0.5) <sup>50</sup>    | 0.3 (0.2~0.4) <sup>53</sup>    | 0.6 (0.5~0.7) <sup>54</sup>    | 0.2 (0.1~0.3) <sup>57</sup>     |
| Length at min age (cm)                               | 8 (3~13) <sup>47</sup>         | 11 (6~16) <sup>50</sup>        | 11 (6~16) <sup>53</sup>        | 8 (3~13) <sup>54</sup>         | 14 (9~19) <sup>57</sup>         |
| Length at max age (cm)                               | 79 (74~84) <sup>47</sup>       | 102 (97~107) <sup>50</sup>     | 108 (103~113) <sup>53</sup>    | 69 (64~74) <sup>54</sup>       | 153 (148~158) <sup>57</sup>     |
| growth rate (year <sup>-1</sup> )                    | 0.3 (0.2~0.4) <sup>47</sup>    | 0.4 (0.3~0.5) <sup>50</sup>    | 0.2 (0.1~0.3) <sup>53</sup>    | 0.6 (0.5~0.7) <sup>54</sup>    | 0.2 (0.1~0.3) <sup>57</sup>     |
| Coefficient of variation of length at young fish (-) | 0.1 (-0.01~0.5)                |                                |                                |                                |                                 |
| Coefficient of variation of length at old fish (-)   | 0.1 (0.01~0.5)                 |                                |                                |                                |                                 |
| Length-weight scaling (kg cm <sup>-3</sup> )         | 1e-4 (0~3) <sup>47</sup>       | 1.7e-5 (0~3) <sup>50</sup>     | 1.70E-05 (0~3) <sup>53</sup>   | 1e-4 (0~3) <sup>54</sup>       | 1e-4 (0~3) <sup>57</sup>        |
| Allometric factor (-)                                | 3.08 (2.5~3.5) <sup>47</sup>   | 3 (2.5~3.5) <sup>50</sup>      | 2.9 (2.5~3.5) <sup>53</sup>    | 3.08 (2.5~3.5) <sup>54</sup>   | 3.08 (2.5~3.5) <sup>57</sup>    |
| Length at 50% maturity (cm)                          | 42 (37~47) <sup>47</sup>       | 53 (48~58) <sup>50</sup>       | 57 (52~62) <sup>53</sup>       | 37 (32~42) <sup>54</sup>       | 77 (72~82) <sup>57</sup>        |
| Maturity slope (cm <sup>-1</sup> )                   | -0.5 (-0.6~-0.4) <sup>47</sup> | -0.5 (-0.6~-0.4) <sup>50</sup> | -0.5 (-0.6~-0.4) <sup>53</sup> | -0.5 (-0.6~-0.4) <sup>54</sup> | -0.5 (-0.6~-0.4) <sup>57</sup>  |
| fecundity option                                     | 5                              | 4                              | 4                              | 4                              | 5                               |
| Fecundity intercept (eggs/kg)                        | 0.6 (0.5~0.7) <sup>48</sup>    | -2.1 (-2.2~-2) <sup>51</sup>   | -2.5 (-2.6~-2.4) <sup>54</sup> | -5 (-10~0) <sup>55</sup>       | 2 (-3~7) <sup>58</sup>          |
| Fecundity slope (eggs/kg <sup>2</sup> )              | 0.7 (0.6~0.8) <sup>48</sup>    | 0.1 (0.01~0.2) <sup>51</sup>   | 0.1 (0.01~0.2) <sup>54</sup>   | 0.1 (0.01~0.2) <sup>55</sup>   | 0.5 (0.4~0.6) <sup>58</sup>     |

|                                 |                                                             |                                                                 |                                                                 |                                                                            |                                                                     |
|---------------------------------|-------------------------------------------------------------|-----------------------------------------------------------------|-----------------------------------------------------------------|----------------------------------------------------------------------------|---------------------------------------------------------------------|
| Log mean virgin recruitment (-) | 4 (2~6) <sup>49</sup>                                       | 5 (3~7) <sup>52</sup>                                           | 4 (2~6) <sup>55</sup>                                           | 4 (2~6) <sup>56</sup>                                                      | 4 (2~6) <sup>59</sup>                                               |
| Steepness (-)                   | 1 (0.9~1.1) <sup>49</sup>                                   | 1 (0.9~1.1) <sup>52</sup>                                       | 1 (0.9~1.1) <sup>55</sup>                                       | 1 (0.9~1.1) <sup>56</sup>                                                  | 1 (0.9~1.1) <sup>59</sup>                                           |
| reference                       | 47.Fishbase<br>48.Kwain, 1982<br>49.GodBout et al.,<br>2008 | 50.Fishbase<br>51. Beacham, 1982<br>52. GodBout et al.,<br>2008 | 53.Fishbase<br>54. Beacham, 1982<br>55. GodBout et al.,<br>2008 | 54.Fishbase<br>55.Hartman & Conkle,<br>1960<br>56. GodBout et al.,<br>2008 | 57.Fishbase<br>58.Kerns et al., 2016<br>59. GodBout et al.,<br>2008 |

Table S1. Cont.

| strategist group                        | periodic strategists            |                                             |                                |                                             |                                 |                                             |                                             |                                                  |                                               |                                 |
|-----------------------------------------|---------------------------------|---------------------------------------------|--------------------------------|---------------------------------------------|---------------------------------|---------------------------------------------|---------------------------------------------|--------------------------------------------------|-----------------------------------------------|---------------------------------|
| Number                                  | 18                              | 19                                          | 20                             | 21                                          | 22                              | 23                                          | 24                                          | 25                                               | 26                                            | 27                              |
| scientific name                         | <i>Sebastes pinniger</i>        | <i>Sebastes maliger</i>                     | <i>Sebastes babcocki</i>       | <i>Sebastes aleutianus</i>                  | <i>Sebastes reedi</i>           | <i>Sebastes brevispinis</i>                 | <i>Sebastes ruberrimus</i>                  | <i>Hippoglossus stenolepis</i>                   | <i>Anoplopoma a fimbria</i>                   | <i>Sebastolobus alascanus</i>   |
| common name                             | Canary rockfish                 | Quillback rockfish                          | Redbande d rockfish            | Rougheye rockfish                           | Yellowmout h rockfish           | Silvergray rockfish                         | Yelloweye rockfish                          | Halibut                                          | sablefish                                     | Shortspine thornyhead           |
| Parameter                               |                                 |                                             |                                |                                             |                                 |                                             |                                             |                                                  |                                               |                                 |
| Natural mortality (year <sup>-1</sup> ) | 0.2<br>(0.1~0.3) <sup>60</sup>  | 0.2<br>(0.1~0.3) <sup>60</sup>              | 0.3<br>(0.2~0.4) <sup>60</sup> | 0.2<br>(0.1~0.3) <sup>60</sup>              | 0.2<br>(0.1~0.3) <sup>60</sup>  | 0.2<br>(0.1~0.3) <sup>60</sup>              | 0.1<br>(0.01~0.2) <sup>6</sup> <sub>0</sub> | 0.1<br>(0.01~0.2) <sup>68</sup>                  | 0.1<br>(0.01~0.2) <sup>72</sup>               | 0.2 (0.1~0.3) <sup>76</sup>     |
| Length at min age (cm)                  | 8 (3~13) <sup>60</sup>          | 7 (2~12) <sup>60</sup>                      | 7 (2~12) <sup>60</sup>         | 7 (2~12) <sup>60</sup>                      | 7 (2~12) <sup>60</sup>          | 8 (3~13) <sup>60</sup>                      | 9 (4~14) <sup>60</sup>                      | 19 (14~24) <sup>68</sup>                         | 9.2<br>(4.2~14.2) <sup>72</sup>               | 9 (4~14) <sup>76</sup>          |
| Length at max age (cm)                  | 56 (51~61) <sup>60</sup>        | 63<br>(58~68) <sup>60</sup>                 | 66<br>(61~71) <sup>60</sup>    | 51<br>(46~56) <sup>60</sup>                 | 47 (42~52) <sup>60</sup>        | 57<br>(52~62) <sup>60</sup>                 | 64<br>(59~69) <sup>60</sup>                 | 185.2<br>(180.2~190.2) <sup>6</sup> <sub>8</sub> | 75.6<br>(70.6~80.6) <sup>7</sup> <sub>2</sub> | 83 (78~88) <sup>76</sup>        |
| growth rate (year <sup>-1</sup> )       | 0.1<br>(0.01~0.2) <sup>60</sup> | 0.1<br>(0.01~0.2) <sup>6</sup> <sub>0</sub> | 0.2<br>(0.1~0.3) <sup>60</sup> | 0.1<br>(0.01~0.2) <sup>6</sup> <sub>0</sub> | 0.1<br>(0.01~0.2) <sup>60</sup> | 0.1<br>(0.01~0.2) <sup>6</sup> <sub>0</sub> | 0.1<br>(0.01~0.2) <sup>6</sup> <sub>0</sub> | 0.1<br>(0.01~0.2) <sup>68</sup>                  | 0.21<br>(0.11~0.31) <sup>7</sup> <sub>2</sub> | 0.1<br>(0.01~0.2) <sup>76</sup> |
| Coefficient of variation of             | 0.1 (-0.01~0.5)                 |                                             |                                |                                             |                                 |                                             |                                             |                                                  |                                               |                                 |



|                                                    |                                          |                                |                             |                             |                             |                             |                             |                                |                                            |                                |
|----------------------------------------------------|------------------------------------------|--------------------------------|-----------------------------|-----------------------------|-----------------------------|-----------------------------|-----------------------------|--------------------------------|--------------------------------------------|--------------------------------|
| length at young fish (-)                           |                                          |                                |                             |                             |                             |                             |                             |                                |                                            |                                |
| Coefficient of variation of length at old fish (-) | 0.1 (0.01~0.5)                           |                                |                             |                             |                             |                             |                             |                                |                                            |                                |
| Length-weight scaling (kg cm <sup>-β</sup> )       | 4.8e-5 (0~3) <sup>60</sup>               | 4.8e-5 (0~3) <sup>60</sup>     | 4.8e-5 (0~3) <sup>60</sup>  | 4.8e-5 (0~3) <sup>60</sup>  | 3.7e-5 (0~3) <sup>60</sup>  | 4.8e-5 (0~3) <sup>60</sup>  | 4.8e-5 (0~3) <sup>60</sup>  | 7.5e-05 (0~3) <sup>68</sup>    | 2e-05 (0~3) <sup>72</sup>                  | 2.3e-5 (0~3) <sup>76</sup>     |
| Allometric factor (-)                              | 3.3 (2.5~3.5) <sup>60</sup>              | 3.3 (2.5~3.5) <sup>60</sup>    | 3.3 (2.5~3.5) <sup>60</sup> | 3.3 (2.5~3.5) <sup>60</sup> | 3 (2.5~3.5) <sup>60</sup>   | 3.3 (2.5~3.5) <sup>60</sup> | 3.3 (2.5~3.5) <sup>60</sup> | 3.1 (2.5~3.5) <sup>68</sup>    | 2.9 (2.5~3.5) <sup>72</sup>                | 3.3 (2.5~3.5) <sup>76</sup>    |
| Length at 50% maturity (cm)                        | 44 (39~49) <sup>61</sup>                 | 26 (21~31) <sup>61</sup>       | 34 (29~39) <sup>61</sup>    | 33 (28~38) <sup>61</sup>    | 38 (33~43) <sup>62</sup>    | 46 (41~51) <sup>63</sup>    | 40 (35~45) <sup>61</sup>    | 121 (116~126) <sup>69</sup>    | 54.6 (49.6~59.6) <sup>7</sup> <sub>3</sub> | 20 (15~25) <sup>77</sup>       |
| Maturity slope (cm <sup>-1</sup> )                 | -0.9 (-1~-0.8) <sup>61</sup>             | -0.3 (-0.4~-0.2) <sup>61</sup> | -0.1 (-0.2~0) <sup>61</sup> | -0.1 (-0.2~0) <sup>61</sup> | -0.1 (-0.2~0) <sup>62</sup> | -0.1 (-0.2~0) <sup>63</sup> | -0.1 (-0.2~0) <sup>61</sup> | -0.4 (-0.5~-0.3) <sup>69</sup> | -0.4 (-0.5~-0.3) <sup>73</sup>             | -1.6 (-1.7~-1.5) <sup>77</sup> |
| fecundity option                                   | 2                                        |                                |                             |                             |                             |                             |                             | 2                              | 5                                          | 5                              |
| Fecundity intercept (eggs/kg)                      | 5e-04 (4.5e-04~5.5e-04) <sup>65,66</sup> |                                |                             |                             |                             |                             |                             | 2 (-3~7) <sup>70</sup>         | -45 (-50~-40) <sup>74</sup>                | -63 (-68~-58) <sup>78</sup>    |

|                                            |                                                                                                                                                                                                                                   |                                |                                |                                |                                |                                |                                |                                                                                                    |                                                                                            |                                                                                                 |
|--------------------------------------------|-----------------------------------------------------------------------------------------------------------------------------------------------------------------------------------------------------------------------------------|--------------------------------|--------------------------------|--------------------------------|--------------------------------|--------------------------------|--------------------------------|----------------------------------------------------------------------------------------------------|--------------------------------------------------------------------------------------------|-------------------------------------------------------------------------------------------------|
| Fecundity slope<br>(eggs/kg <sup>2</sup> ) | 3 (2.9~3.1) <sup>65,66</sup>                                                                                                                                                                                                      |                                |                                |                                |                                |                                |                                | 3 (-2~8) <sup>70</sup>                                                                             | 125<br>(120~130) <sup>74</sup>                                                             | 223<br>(218~228) <sup>78</sup>                                                                  |
| Log mean virgin recruitment<br>(-)         | 8 (6~10) <sup>67</sup>                                                                                                                                                                                                            | 9 (7~11) <sup>67</sup>         | 9 (7~11) <sup>67</sup>         | 8 (6~10) <sup>67</sup>         | 9 (7~11) <sup>67</sup>         | 8 (6~10) <sup>67</sup>         | 9 (7~11) <sup>67</sup>         | 7.4 (5.4~9.4) <sup>71</sup>                                                                        | 4 (2~6) <sup>75</sup>                                                                      | 9 (7~11) <sup>79</sup>                                                                          |
| Steepness (-)                              | 0.5<br>(0.4~0.6) <sup>67</sup>                                                                                                                                                                                                    | 0.5<br>(0.4~0.6) <sup>67</sup> | 0.5<br>(0.4~0.6) <sup>67</sup> | 0.5<br>(0.4~0.6) <sup>67</sup> | 0.5<br>(0.4~0.6) <sup>67</sup> | 0.5<br>(0.4~0.6) <sup>67</sup> | 0.5<br>(0.4~0.6) <sup>67</sup> | 0.5 (0.4~0.6) <sup>71</sup>                                                                        | 0.8<br>(0.7~0.9) <sup>75</sup>                                                             | 0.8 (0.7~0.9) <sup>79</sup>                                                                     |
| reference                                  | 60.Fishbase<br>61.Echeverria, 1988<br>62.Haigh &Starr, 2008<br>63.Stanley &Kronlund, 2005<br>64.Conrath &Knoth, 2013<br>65.Love, Morris, McCrae, &Colins, 1990<br>66.Beyer, Sogard, Harvey, &Field, 2015<br>67.Brand et al., 2007 |                                |                                |                                |                                |                                |                                | 68.Fishbase<br>69.C.Schmitt &St-Pierre, 1997<br>70.Haug &Gulliksen, 1988<br>71. Brand et al., 2007 | 72.Fishbase<br>73.Head et al., 2014<br>74.Hunter et al., 1989<br>75.Schirripa et al., 2009 | 76.Fishbase<br>77.Pearson &Gunderson , 2003<br>78.Cooper et al., 2005<br>79. Brand et al., 2007 |

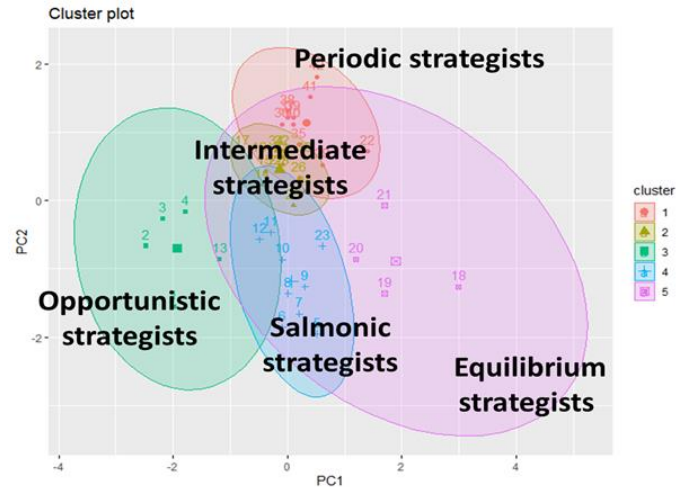

**Figure S1.** The results of cluster analysis for the 42 fish species in King & McFarlane (2003). The red circle is the periodic strategists, the yellow circle is the intermediate strategists, the green circle is the opportunistic strategists, the blue circle is the salmonic strategists and the purple circle is the equilibrium strategists.

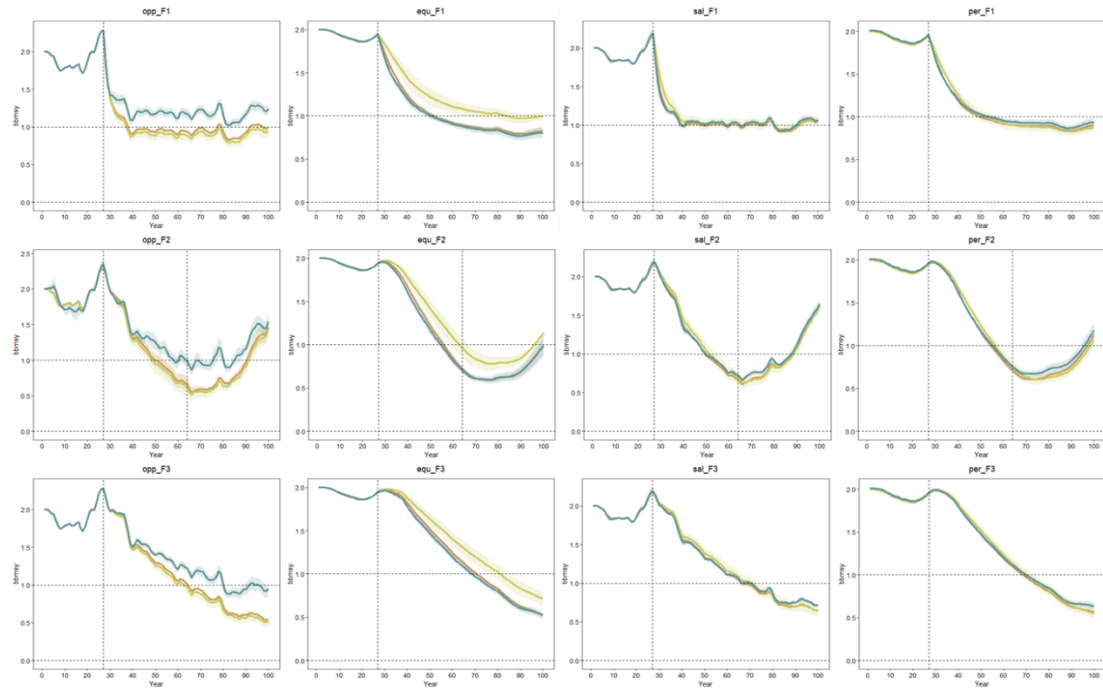

**Figure S2.** The time series of the simulated B/Bmsy of four life history strategists (OPP, EQU, SAL, PER) in three F-scenarios (F1, F2, F3) and three S- scenarios (S0, S1, S2). The line is the mean BBmsy of all species in one strategists with standard errors are the shaded areas.
